# Supplementary material
Source: publisher figshare collection journal article supplement (https://acs.figshare.com/ndownloader/files/7684699)
Supplement: Supplementary file 1 [file 7684699]

## Supporting Information

# One-Step Interface Engineering for All-Inkjet-Printed All-Organic Components in Transparent, Flexible Transistors and Inverters: Polymer Binding

*Jewook Ha,<sup>‡,†</sup> Seungjun Chung,<sup>§,†</sup> Mingyuan Pei,<sup>⊥</sup> Kilwon Cho,<sup>||</sup> Hoichang Yang,<sup>⊥,\*</sup> and*

*Yongtaek Hong<sup>‡,\*</sup>*

<sup>‡</sup>Department of Electrical and Computer Engineering (ECE), Inter-university Semiconductor Research Center (ISRC), Seoul National University, Seoul 08826, Republic of Korea,

<sup>§</sup>Department of Physics and Astronomy, Seoul National University, Seoul 08826, Republic of Korea, <sup>⊥</sup>Department of Applied Organic Materials Engineering, Inha University, Incheon 22212, Republic of Korea, <sup>||</sup>Department of Chemical Engineering, Pohang University of Science and Technology, Pohang 37673, Republic of Korea

### Corresponding Author

\*(Y.H.) E-mail: yongtaek@snu.ac.kr; Phone: +82-2-880-9567

\*(H.Y.) E-mail: hcyang@inha.ac.kr; Phone: +82-32-860-7494

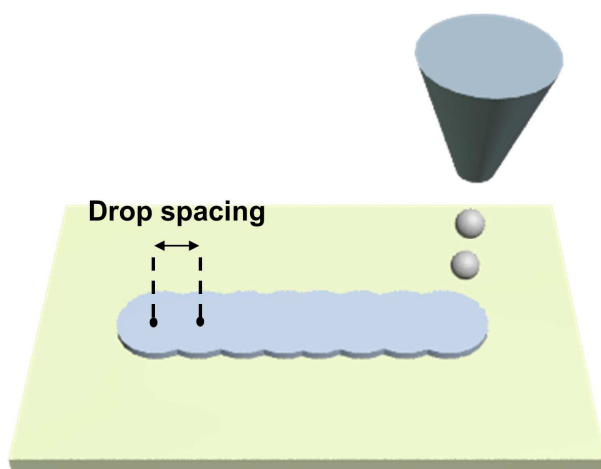

**Figure S1.** Definition of a drop spacing in the inkjet-printing procedure.

**Table S1.** The detailed jetting parameters to inkjet-print each layer in this study. Note that a piezoelectric inkjet head contains 16 jetting nozzles, with a diameter of 21  $\mu\text{m}$ , which jet individual ink drops of 10 pL volume.

| Jetting parameter                  | Layer     |     |                                         |                |
|------------------------------------|-----------|-----|-----------------------------------------|----------------|
|                                    | PEDOT:PSS | PVP | PS-Si(CH <sub>3</sub> ) <sub>2</sub> Cl | TIPS pentacene |
| # of nozzles                       | 4         | 8   | 16                                      | 16             |
| drop velocity [m s <sup>-1</sup> ] | 12        | 8   | 5                                       | 5              |
| frequency [kHz]                    | 5         | 5   | 5                                       | 5              |
| drop spacing [ $\mu\text{m}$ ]     | 25        | 25  | 5                                       | 5              |
| substrate temperature [°C]         | RT        | RT  | RT                                      | RT             |

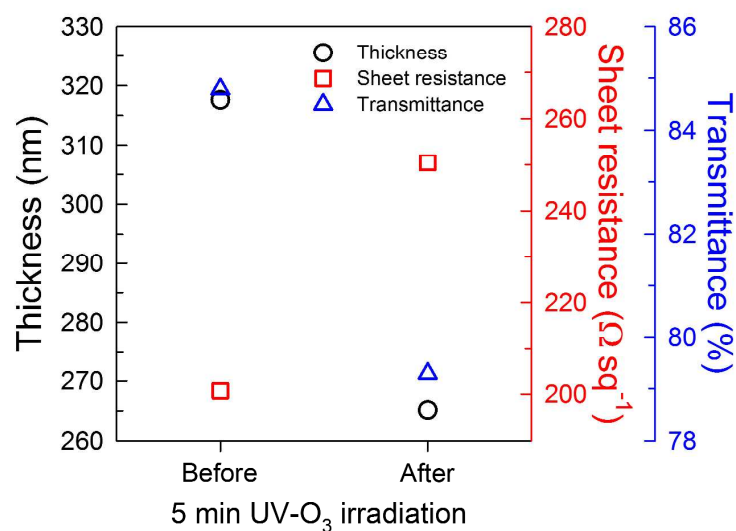

**Figure S2.** Variations in transmittance and sheet resistance of inkjet-printed PEDOT:PSS layer before and after UV- $\text{O}_3$  irradiation for 5 min.

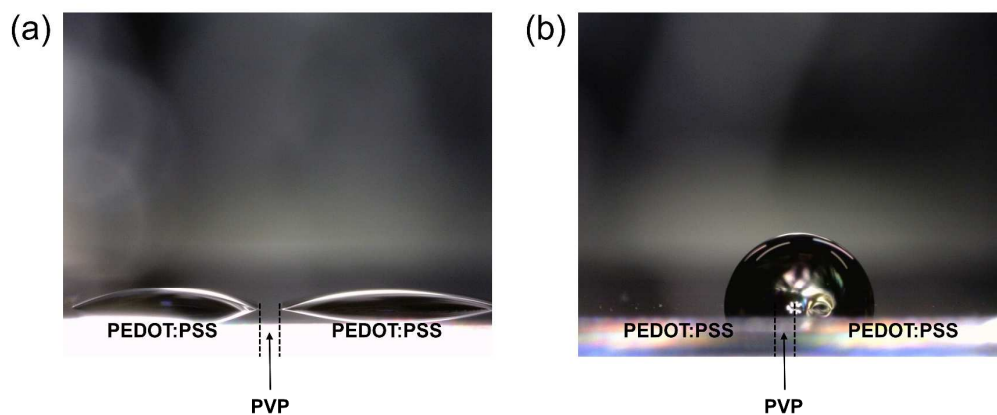

**Figure S3.** Discernible wetting behaviors of water droplets located on (a) untreated and (b) treated PEDOT:PSS and PVP surfaces.

As shown in Figure S3a, a water droplet was split and preferentially located to hydrophilic PEDOT:PSS sides. In contrast, a similar volume of water formed a singular water droplet with a

contact angle of approximately  $91^\circ$  on the polymer-treated PEDOT:PSS and PVP surfaces (Figure S3b).

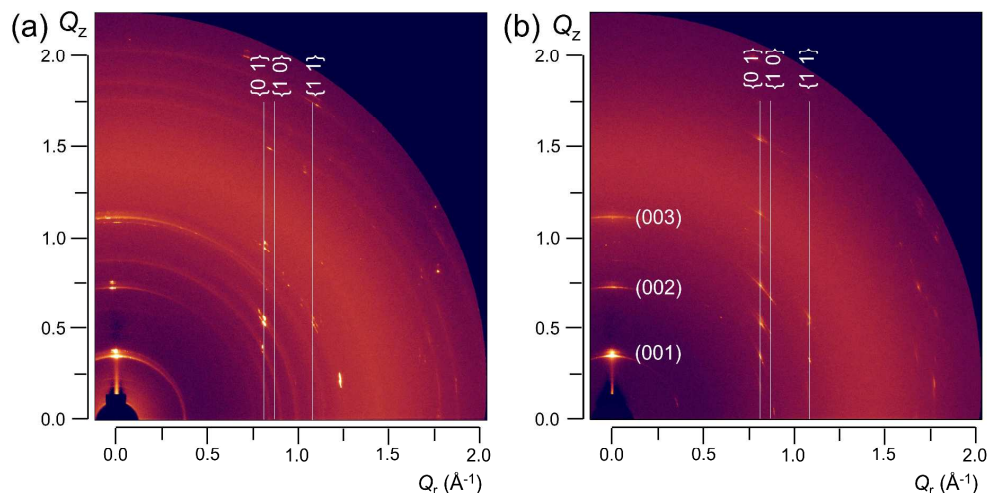

**Figure S4.** 2D GIXD patterns of TIPS pentacene films inkjet-printed on (a) untreated and (b) PS-Si(CH<sub>3</sub>)<sub>2</sub>Cl-treated surfaces.

Synchrotron-based 2D GIXD (Pohang Accelerator Laboratory, 9A, Korea) was conducted on TIPS pentacene films inkjet-printed onto the untreated and PS-Si(CH<sub>3</sub>)<sub>2</sub>Cl-treated surfaces. Typical area of a TIPS pentacene layer inkjet-printed on a single TFT was approximately  $1,500 \times 1,500 \mu\text{m}^2$ , which was hard to be aligned using the GIXD mode with an incident angle of X-ray. Due to this reason, we inkjet-printed  $3,000 \times 5,000 \mu\text{m}^2$  patterned layers of TIPS pentacene on both the untreated and PS-Si(CH<sub>3</sub>)<sub>2</sub>Cl-treated surfaces, which had the same geometry with TFTs used in this study. As shown in Figure S4, TIPS pentacene films on the PS-Si(CH<sub>3</sub>)<sub>2</sub>Cl-treated surface showed highly ordered crystal structure (Figure S4b), in comparison to the untreated system containing less-ordered crystals, as determined by the broad X-ray reflection along the Debye rings (Figure S4a).

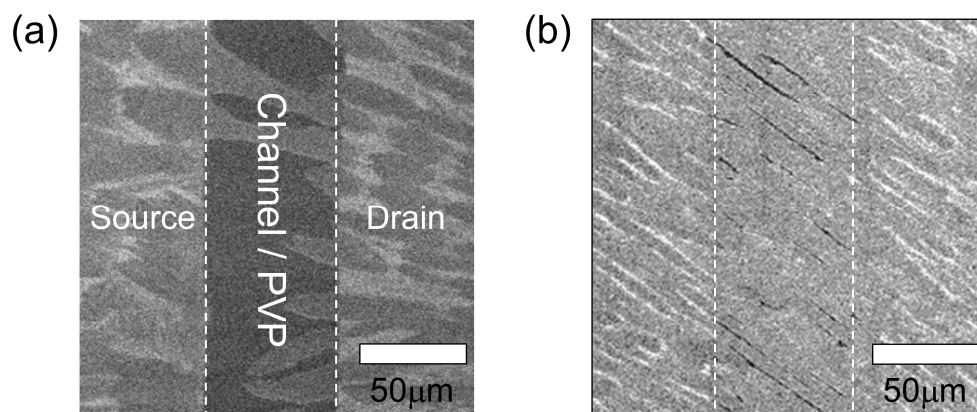

**Figure S5.** SEM images of the TIPS pentacene channel layers near the contact region inkjet-printed on (a) without and (b) with PS-treated surfaces.

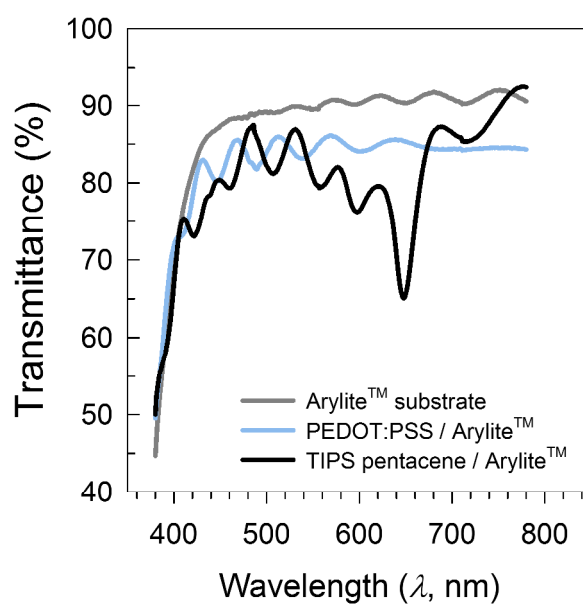

**Figure S6.** Transmittances of bare Arylite™ film, inkjet-printed PEDOT:PSS, and TIPS pentacene films on the Arylite™ substrate.

### Calculation of $E_r$

From the unloading curve in Figure 4d, the elastic stiffness ( $S$ ) can be defined as the slope of the tangential line at the uppermost portion of the unloading curve:<sup>R1</sup>

$$S = \frac{dP}{dH} \quad (S1)$$

where  $P$  and  $H$  are the load force and displacement, respectively.

The loading-unloading process is illustrated schematically in Figure S7. Note that the depth at a final unloaded state ( $H_f$ ) usually shows a non-zero value due to a plastic deformation observed during the previous loading cycle. The unloading curve can be modeled using a power law relation:

$$P = \alpha(H - H_f)^m \quad (S2)$$

where  $\alpha$  and  $m$  are power law fitting parameters.

Sink-in depth ( $H_s$ ) is expressed as follows:

$$H_s = \varepsilon \frac{P_{\max}}{S} \quad (S3)$$

where  $\varepsilon$  is a parameter related to the indenter geometry.

The vertical displacement of the contact depth ( $H_c$ ) can be calculated from  $H_s$  and the maximum depth ( $H_{\max}$ ):

$$H_c = H_{\max} - H_s = H_{\max} - \varepsilon \frac{P_{\max}}{S} \quad (S4)$$

Finally,  $E_r$  can be calculated by the following equation:

$$E_r = \frac{S}{2\beta} \sqrt{\frac{\pi}{A_p(H_c)}} \quad (S5)$$

where  $\beta$  and  $A_p(H_c)$  represent a geometrical constant and the projected area at the  $H_c$  during loading, respectively.

The measured and extracted parameters of the inkjet-printed PEDOT:PSS and Ag electrodes are summarized in Table S2.

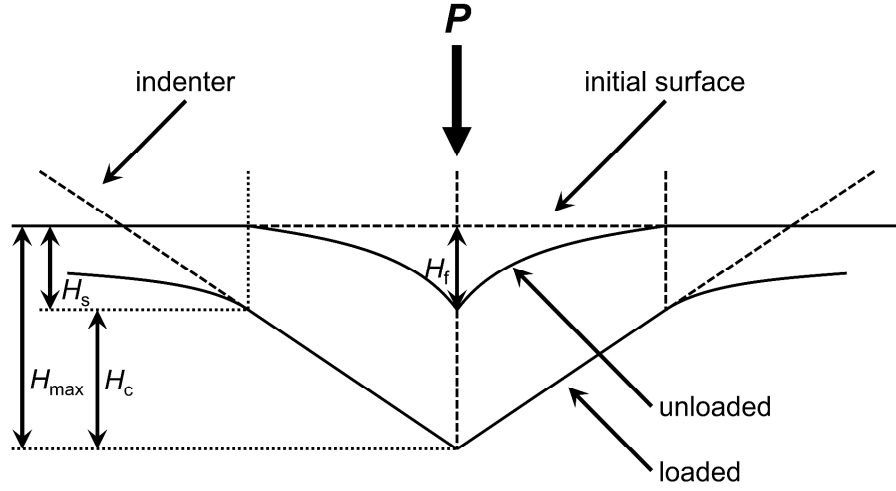

**Figure S7.** Schematic illustration of the loading-unloading process during a nano-indentation.

**Table S2.**  $E_r$  values of the inkjet-printed PEDOT:PSS and Ag electrodes based on the measured parameters

| Parameters                     | Inkjet-printed PEDOT:PSS | Inkjet-printed Ag |
|--------------------------------|--------------------------|-------------------|
| $E_r$ (Gpa)                    | 0.61                     | 47.5              |
| $H_c$ (nm)                     | 193.3                    | 298.24            |
| $S$ ( $\mu\text{N nm}^{-1}$ )  | 0.8                      | 156.15            |
| $P_{\max}$ (mN)                | 0.1                      | 6.0               |
| $H_{\max}$ (nm)                | 287.6                    | 405.83            |
| $A_p(H_c)$ ( $\mu\text{m}^2$ ) | 1.25                     | 5.03              |

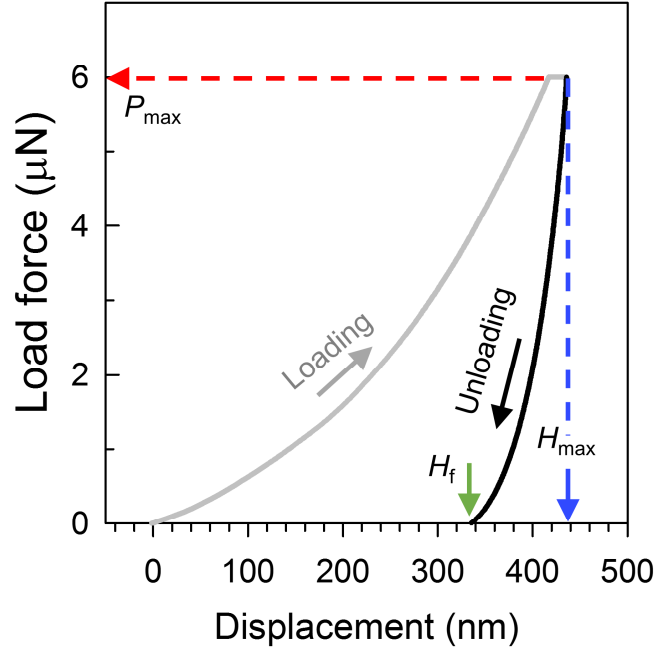

**Figure S8.** Force – displacement curve of an approximately 400-nm-thick Ag layer on the Arylite™ film during a nano-indenting cycle of loading-unloading.

#### Calculation of $N_{SS}^{\max}$

From an amorphous silicon transistor model,  $N_{SS}^{\max}$  can be estimated from the following equation:<sup>R2</sup>

$$N_{SS}^{\max} = \left( \frac{SS \log e}{kT / q} \right) \frac{C_{ins}}{q^2} \quad (S6)$$

where  $k$ ,  $T$ ,  $q$ , and  $C_{ins}$  represent the Boltzmann constant, the absolute temperature, the electron charge, and the capacitance of the gate dielectric, respectively. From the measured  $SS$  and the  $N_{SS}^{\max}$  values of OTFTs on the untreated and treated surfaces were calculated to be  $2.03 \times 10^{12}$  and  $5.12 \times 10^{11} \text{ cm}^{-2} \text{ eV}^{-1}$ , respectively.



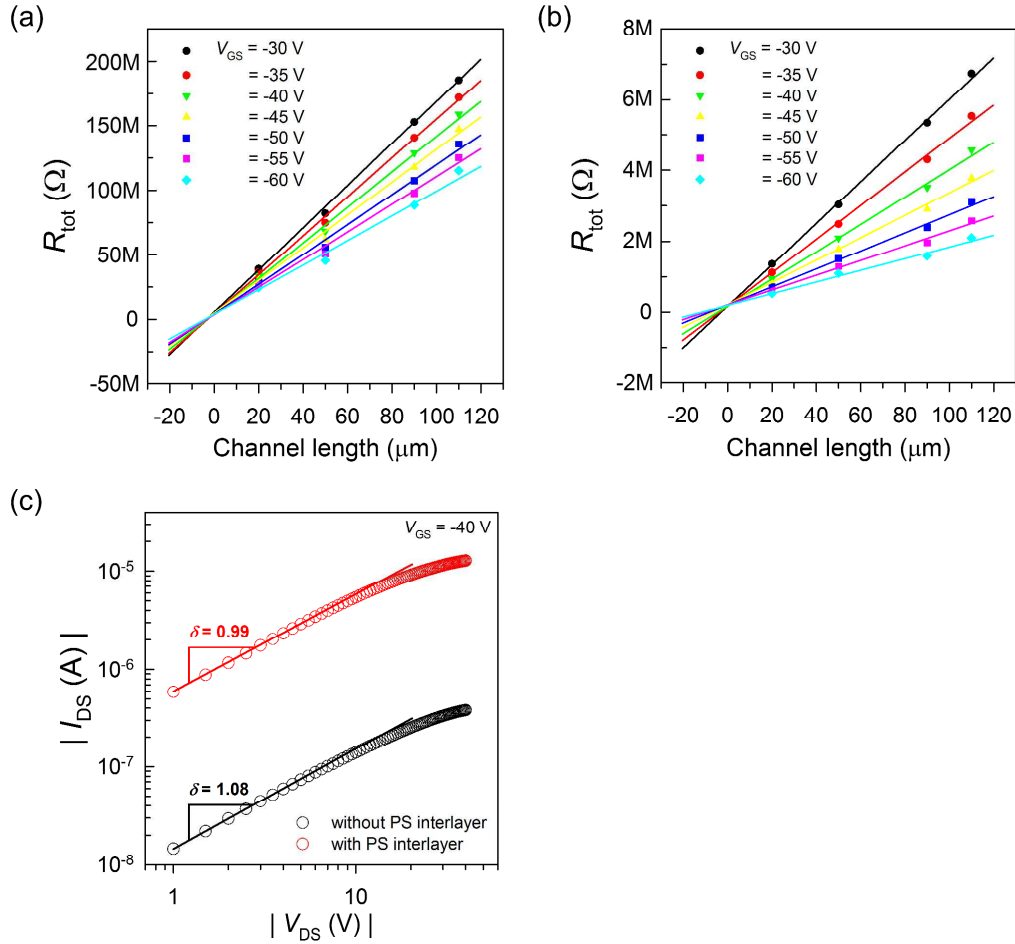

**Figure S9.** (a, b) TLM results for OTFTs on (a) untreated and (b) treated surfaces. (c)  $I_{DS} - V_{DS}$  relationship in log scale of OTFTs.

The  $R_c$  values between the PEDOT:PSS  $S/D$  electrodes and TIPS pentacene semiconductor layer were extracted using TLM. In a linear regime, the total resistance ( $R_{tot}$ ) is expressed as a summation of the channel resistance ( $R_{ch}$ ) and the  $R_c$ .<sup>R3</sup>

$$R_{tot} = R_{ch} + R_c = \frac{1}{\mu_{FET} W C_{ins} (V_{GS} - V_{th} - V_{DS} / 2)} L + R_c \quad (S7)$$

Based on Equation S7,  $R_c$  can be extracted from the y-intercept of the  $R_{tot} - L$  graph. Figures S9a and S9b show the  $R_{tot} - L$  graphs of the OTFTs on untreated and treated surfaces at  $V_{DS} = -5$

V, respectively. The resulting  $R_c$  values of the OTFTs on the untreated and treated surfaces were extracted to be 208 and 16.2 k $\Omega$  cm, respectively. The observed  $R_c$  values were comparable to those of bottom-contact and top-contact OTFTs with evaporated Au electrodes, respectively.<sup>R4</sup>

Additionally, the  $I_{DS} - V_{DS}$  relationship (Figure S9c) strongly supports that the PS interlayer enhanced the contact property between the  $S/D$  electrodes and the semiconductor layer. Assuming  $I_{DS} \propto V_{DS}^\delta$ , a  $\delta$  value close to 1 indicates that the output characteristic shows good linearity in the low  $V_{DS}$  regime. From the graph,  $\delta$  values of the OTFTs changed from 1.07 to 0.99 by introducing the PS interlayer.

**Table S3.** Comparative electrical characteristics of previously reported transparent OTFTs

| Substrate             | Electrode                                                         | Semiconductor  | $\mu_{FET}$<br>[cm <sup>2</sup> V <sup>-1</sup> s <sup>-1</sup> ] | $I_{on}/I_{off}$     | $R_c$<br>[k $\Omega$ cm] | Reference |
|-----------------------|-------------------------------------------------------------------|----------------|-------------------------------------------------------------------|----------------------|--------------------------|-----------|
| Arylite <sup>TM</sup> | PEDOT:PSS                                                         | TIPS pentacene | 0.27                                                              | $> 10^6$             | 16.2                     | This work |
| Arylite <sup>TM</sup> | PEDOT:PSS                                                         | Pentacene      | 0.035                                                             | $\sim 10^6$          | $\sim 1000$              | R5        |
| PES                   | PEDOT:PSS                                                         | TIPS pentacene | 0.05                                                              | $\sim 10^4$          | N/A                      | R6        |
| PET                   | PEDOT:PSS                                                         | TIPS pentacene | 0.0078                                                            | $\sim 10^4$          | N/A                      | R7        |
| Arylite <sup>TM</sup> | Graphene                                                          | Pentacene      | 0.12                                                              | $\sim 10^4$          | 8 ~ 20                   | R8        |
| Glass                 | ITO                                                               | P3HT           | 0.01                                                              | $\sim 10^4$          | N/A                      | R9        |
| Glass                 | ITO                                                               | Pentacene      | 0.226                                                             | N/A                  | 260                      | R10       |
| Glass                 | Sb <sub>2</sub> O <sub>3</sub> /Ag/Sb <sub>2</sub> O <sub>3</sub> | Pentacene      | 0.3                                                               | $\sim 10^3$          | N/A                      | R11       |
| Glass                 | WO <sub>3</sub> /Ag/WO <sub>3</sub>                               | PSeTPTI        | 0.038                                                             | $\sim 2 \times 10^6$ | N/A                      | R12       |
| Glass                 | WO <sub>3</sub> /Ag/WO <sub>3</sub>                               | Pentacene      | 0.0844                                                            | $1.2 \times 10^6$    | 252000                   | R13       |
| Glass                 | Ag network                                                        | DNTT           | 0.12                                                              | $> 10^7$             | N/A                      | R14       |

## Noise Margin

The terminology 'noise' in logic circuits means unwanted variations in voltage or current at logic nodes. If the magnitude of noise is larger than a critical value, known as the noise margin ( $NM$ ) of the logic circuit, it will cause logic errors. When the noise value is smaller than  $NM$ , the noise will be attenuated as it passes from input to output. As a result,  $NM$  is used as a factor to specify the range over which the logic circuits will function properly.

For a noiseless system, we can write the equation for an inverter as:

$$V_{out} = f(V_{in}) \quad (S8)$$

With noise  $v_n$  added, a noisy output is produced as

$$V'_{out} = f(V_{in} + v_n) \quad (S9)$$

A Taylor series expansion of the output function allows us to examine the important factors determining  $V_{out}$  in the presence of noise:

$$V'_{out} = f(V_{in}) + v_n \frac{\partial V_{out}}{\partial V_{in}} + v_n \frac{\partial^2 V_{out}}{\partial V_{in}^2} + \dots \quad (S10)$$

Because the noise is small, higher-order terms could be ignored. Then, the noisy output could be simplified by the noiseless output plus the noise multiplied by  $A_v$  of the inverter. Therefore, if the inverter is operated in the region where  $|A_v| < 1$ , the circuit will attenuate the noise and hold the output in the desired range.

There are two unity gain points, where  $A_v = -1$  (Figure S10). The two points are defined as voltage input low ( $V_{IL}$ ) and voltage input high ( $V_{IH}$ ). These two unity gain points, the voltage output high ( $V_{OH}$ ), and the voltage output low ( $V_{OL}$ ) can be used to define the  $NMs$  as follows:

$$NM_H = V_{OH} - V_{IH} \quad (S11)$$

$$NM_L = V_{IL} - V_{OL} \quad (S12)$$

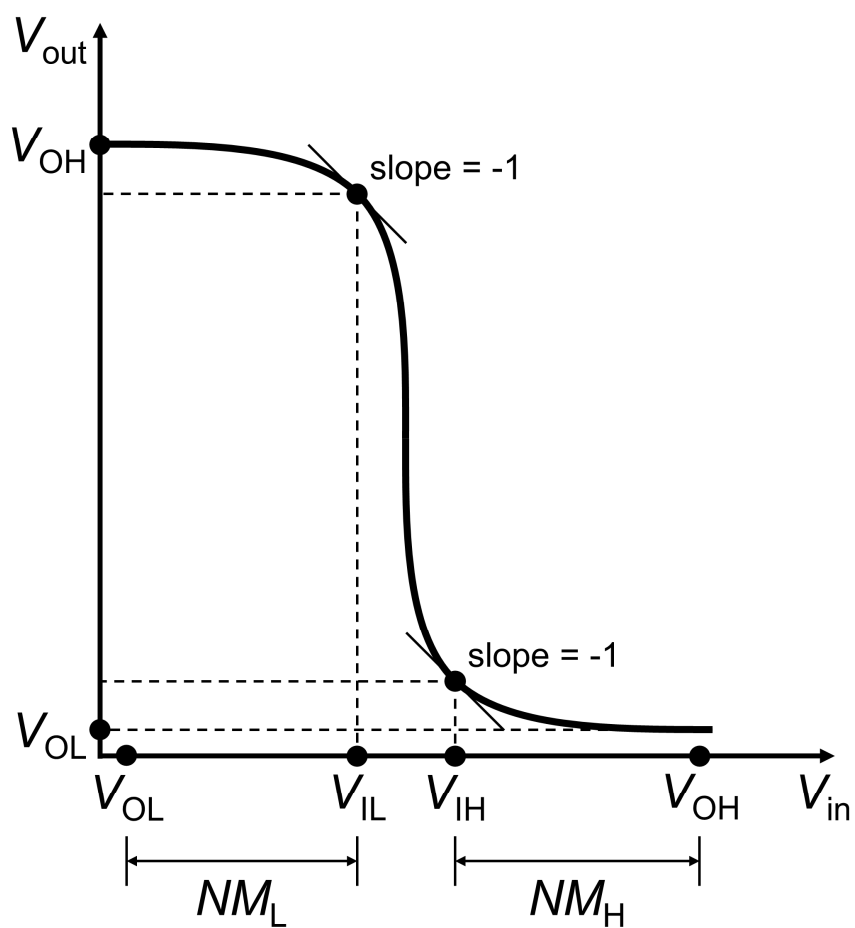

**Figure S10.** Definition of  $NM$  in a voltage – transfer curve.

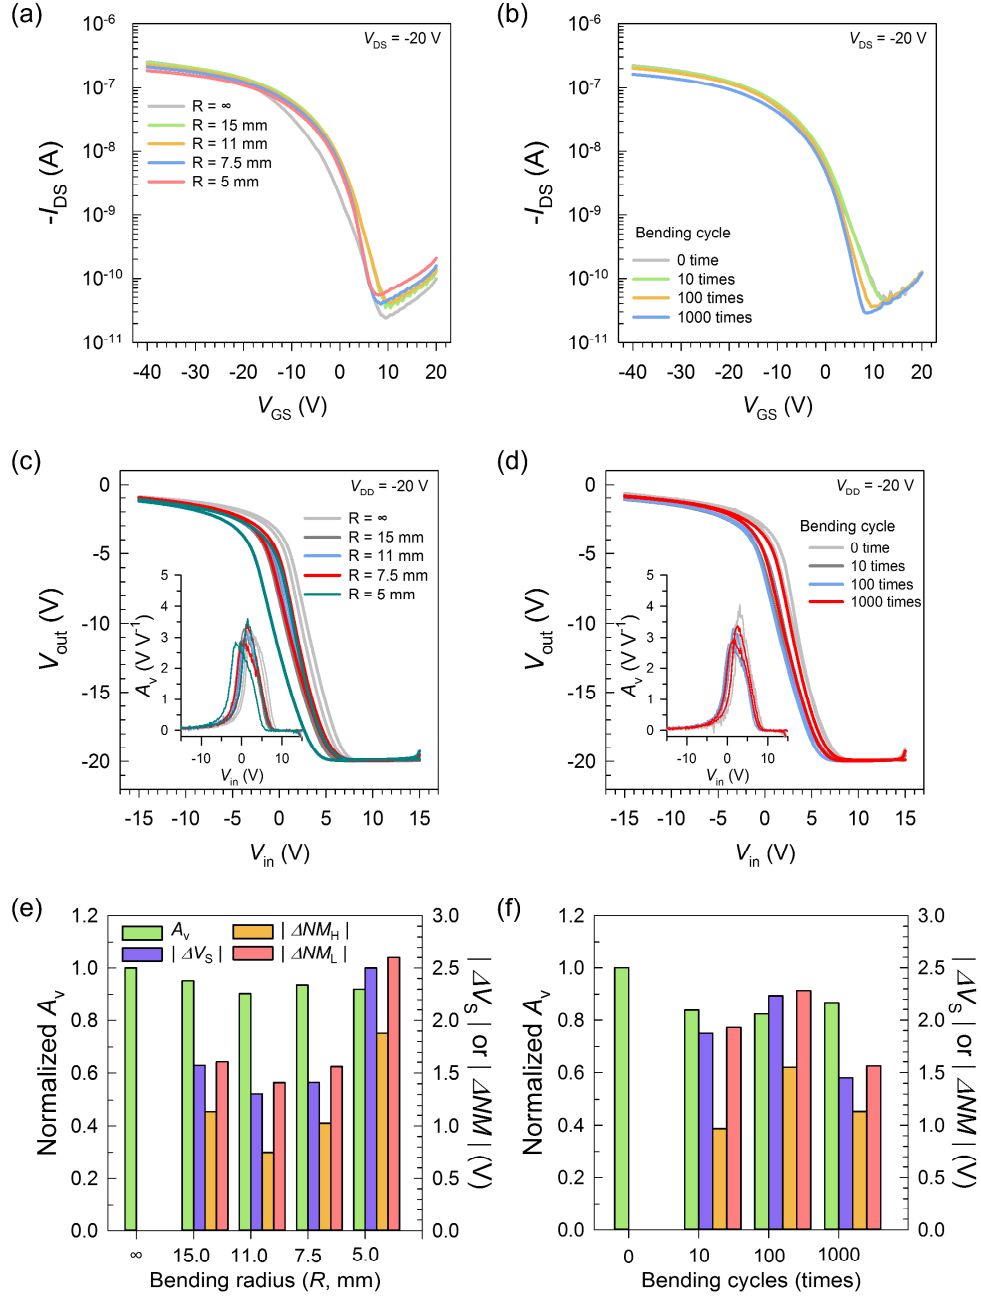

**Figure S11.** (a, b)  $I_{DS} - V_{GS}$  transfer curves of OTFTs and (c, d)  $V_{out} - V_{in}$  voltage-transfer curves of organic inverters on the untreated surfaces (a, c) in a bent state with various  $R$  values, and (b, d) after different bending cycles at  $R = 5$  mm (the insets in (c) and (d) represent the corresponding  $A_v - V_{in}$  curves). (e, f) Subsequent relative changes in the electrical characteristics of the inverters.

## REFERENCES

- (R1) Oliver, W. C.; Pharr, G. M. Measurement of Hardness and Elastic Modulus by Instrumented Indentation: Advances in Understanding and Refinements to Methodology. *J. Mater. Res.* **2004**, *19*, 3–20.
- (R2) Rolland, A.; Richard, J.; Kleider, J. P.; Mencaraglia, D. Electrical Properties of a-Si Transistors and MIS-Devices: Comparative Study of Top Nitride and Bottom Nitride Configurations. *J. Electrochem. Soc.* **1993**, *140*, 3679–3683.
- (R3) Gundlach, D. J.; Zhou, L.; Nichols, J. A.; Jackson, T. N.; Necliudov, P. V.; Shur, M. S. An Experimental Study of Contact Effects in Organic Thin Film Transistors. *J. Appl. Phys.* **2006**, *100*, 024509.
- (R4) Chung, S.; Jeong, J.; Kim, D.; Park, Y.; Lee, C.; Hong, Y. Contact Resistance of Inkjet-Printed Silver Source–Drain Electrodes in Bottom-Contact OTFTs. *J. Disp. Technol.* **2012**, *8*, 48–53.
- (R5) Lim, S.; Kang, B.; Kwak, D.; Lee, W. H.; Lim, J. A.; Cho, K. Inkjet-Printed Reduced Graphene Oxide/Poly(Vinyl Alcohol) Composite Electrodes for Flexible Transparent Organic Field-Effect Transistors. *J. Phys. Chem. C* **2012**, *116*, 7520–7525.
- (R6) Han, J. I.; Kim, Y.-H.; Park, S. K. Enhanced Stability of All Solution-Processed Organic Thin-Film Transistors Using Highly Conductive Modified Polymer Electrodes. *Jpn. J. Appl. Phys.* **2012**, *51*, 091602.
- (R7) Basiricò, L.; Cosseddu, P.; Fraboni, B.; Bonfiglio, A. Inkjet Printing of Transparent, Flexible, Organic Transistors. *Thin Solid Films* **2011**, *520*, 1291–1294.

(R8) Lee, W. H.; Park, J.; Sim, S. H.; Jo, S. B.; Kim, K. S.; Hong, B. H.; Cho, K. Transparent Flexible Organic Transistors Based on Monolayer Graphene Electrodes on Plastic. *Adv. Mater.* **2011**, *23*, 1752–1756.

(R9) Seo, J.; Song, M.; Lee, C.; Nam, S.; Kim, H.; Park, S.-Y.; Kang, I.-K.; Lee, J.-H.; Kim, Y. Physical Force-Sensitive Touch Responses in Liquid Crystal-Gated-Organic Field-Effect Transistors with Polymer Dipole Control Layers. *Org. Electron.* **2016**, *28*, 184–188.

(R10) Li, Y.-C.; Lin, Y.-J.; Wei, C.-Y.; Lin, Z.-X.; Wen, T.-C.; Chang, M.-Y.; Tsai, C.-L.; Wang, Y.-H. Performance Improvement in Transparent Organic Thin-Film Transistors with Indium Tin Oxide/Fullerene Source/Drain Contact. *Appl. Phys. Lett.* **2009**, *95*, 163303.

(R11) Zhang, N.; Hu, Y.; Lin, J.; Li, Y.; Liu, X. Transparent Ambipolar Organic Thin Film Transistors Based on Multilayer Transparent Source-Drain Electrodes. *Appl. Phys. Lett.* **2016**, *109*, 063301.

(R12) Qi, Z.; Cao, J.; Li, H.; Ding, L.; Wang, J. Solution-Processed Ultrathin Organic Semiconductor Film: Toward All-Transparent Highly Stable Transistors. *Adv. Electron. Mater.* **2015**, *1*, 1500173.

(R13) Zhang, N.; Hu, Y.; Liu, X. Transparent Organic Thin Film Transistors with WO<sub>3</sub>/Ag/WO<sub>3</sub> Source-Drain Electrodes Fabricated by Thermal Evaporation. *Appl. Phys. Lett.* **2013**, *103*, 033301.

(R14) Pei, K.; Wang, Z.; Ren, X.; Zhang, Z.; Peng, B.; Chan, P. K. L. Fully Transparent Organic Transistors with Junction-Free Metallic Network Electrodes. *Appl. Phys. Lett.* **2015**, *107*, 033302.
